# Supplementary material for: A chronic murine model of pulmonary Acinetobacter baumannii infection enabling the investigation of late virulence factors, long-term antibiotic treatments, and polymicrobial infections
Source: PubMed Central journal article supplement — bioRxiv. 2024 Sep 18:2024.09.17.613469. Preprint. [Version 2] doi: 10.1101/2024.09.17.613469 (PMC11429896; doi:10.1101/2024.09.17.613469), 2024-09-18
Supplement: NIHPP2024.09.17.613469v2-supplement-1.pdf [file NIHPP2024.09.17.613469v2-supplement-1.pdf]

543 **Tables**

544 **Table S1. Cytokine analysis at 4 h, 2 d, and 7 d post-intranasal infection with G636.**

| Cytokine <sup>a,b</sup> | WT                           |                                    |                | <i>tlr4</i> mutant   |                                    |               |
|-------------------------|------------------------------|------------------------------------|----------------|----------------------|------------------------------------|---------------|
|                         | 10 <sup>5</sup> G636         | 10 <sup>8</sup> G636               | Mock           | 10 <sup>5</sup> G636 | 10 <sup>8</sup> G636               | Mock          |
| <b>4 h</b>              |                              |                                    |                |                      |                                    |               |
| IL-23                   | 23.26 (10.14)                | 38.53 (6.36)                       | 10.67 (7.09)   | 22.57 (13.26)        | 32.61 (3.61)                       | 15.90 (15.90) |
| IL-1α                   | 58.57 (18.27)                | 323.11 (75.42) <sup>#,\$</sup>     | 2.5 (0.43)     | 2.77 (0.47)          | 429.19 (90.22) <sup>#,\$</sup>     | 1.49 (0.13)   |
| IFN-γ                   | 0.77 (0.36)                  | 5.13 (1.30) <sup>#,\$</sup>        | 0.00 (0.00)    | 0.23 (0.23)          | 4.34 (0.39) <sup>#,\$</sup>        | 0.00 (0.00)   |
| TNF-α                   | 2219.55 (214.72)             | 14888.73 (311.27) <sup>#,\$</sup>  | 108.38 (66.66) | 49.51 (6.47)         | 12802.47 (3073.56) <sup>#,\$</sup> | 12.82 (3.58)  |
| MCP-1                   | 0.00 (0.00)                  | 65.73 (15.07) <sup>#,\$</sup>      | 0.00 (0.00)    | 0.00 (0.00)          | 65.57 (8.23) <sup>#,\$</sup>       | 0.00 (0.00)   |
| IL-12p70                | 0.00 (0.00)                  | 1.43 (1.43)                        | 0.00 (0.00)    | 0.00 (0.00)          | 0.00 (0.00)                        | 0.00 (0.00)   |
| IL-1β                   | 9.50 (1.95)                  | 46.26 (10.54) <sup>#,\$</sup>      | 0.00 (0.00)    | 0.00 (0.00)          | 56.58 (12.58) <sup>#,\$</sup>      | 0.00 (0.00)   |
| IL-10                   | 0.00 (0.00)                  | 4.18 (4.18)                        | 0.00 (0.00)    | 0.00 (0.00)          | 2.04 (2.04)                        | 0.00 (0.00)   |
| IL-6                    | 910.41 (172.71)              | 7885.57 (1645.56) <sup>#,\$</sup>  | 18.19 (5.67)   | 8.09 (2.69)          | 6334.72 (1218.67) <sup>#,\$</sup>  | 2.70 (2.70)   |
| IL-27                   | 0.00 (0.00)                  | 85.90 (13.54) <sup>#,\$</sup>      | 0.00 (0.00)    | 0.00 (0.00)          | 42.77 (24.83) <sup>\$</sup>        | 0.00 (0.00)   |
| IL-17A                  | 1.05 (0.74)                  | 8.36 (2.46) <sup>#,\$</sup>        | 0.00 (0.00)    | 0.00 (0.00)          | 4.66 (0.39) <sup>#,\$</sup>        | 0.00 (0.00)   |
| IFN-β                   | 0.00 (0.00)                  | 29.75 (17.23) <sup>*,#,\$</sup>    | 0.00 (0.00)    | 0.00 (0.00)          | 0.00 (0.00)                        | 0.00 (0.00)   |
| GM-CSF                  | 96.65 (13.37) <sup>*,#</sup> | 55.42 (7.19) <sup>#,\$</sup>       | 0.00 (0.00)    | 0.00 (0.00)          | 47.41 (6.96) <sup>#,\$</sup>       | 0.00 (0.00)   |
| <b>2 d</b>              |                              |                                    |                |                      |                                    |               |
| IL-23                   | 19.93 (9.61)                 | 27.05 (8.76)                       | 44.09 (21.87)  | 26.04 (11.37)        | 11.35 (5.56)                       | 72.50 (36.30) |
| IL-1α                   | 1.14 (0.19)                  | 157.28 (58.45) <sup>*,#,\$</sup>   | 1.13 (0.20)    | 2.00 (0.50)          | 25.68 (6.15)                       | 19.64 (18.02) |
| IFN-γ                   | 2.20 (0.98)                  | 212.26 (54.96) <sup>*,#,\$</sup>   | 0.00 (0.00)    | 3.70 (2.48)          | 4.96 (2.48)                        | 0.00 (0.00)   |
| TNF-α                   | 1.85 (0.82)                  | 592.26 (154.11) <sup>*,#,\$</sup>  | 1.03 (0.60)    | 19.79 (6.79)         | 52.20 (8.86)                       | 5.76 (4.31)   |
| MCP-1                   | 0.00 (0.00)                  | 160.30 (14.27) <sup>*,#,\$</sup>   | 0.00 (0.00)    | 0.00 (0.00)          | 33.52 (6.37) <sup>#,\$</sup>       | 0.00 (0.00)   |
| IL-12p70                | 0.00 (0.00)                  | 46.17 (17.63) <sup>*,#,\$</sup>    | 0.00 (0.00)    | 0.00 (0.00)          | 0.00 (0.00)                        | 0.00 (0.00)   |
| IL-1β                   | 1.06 (1.06)                  | 12.35 (2.80) <sup>*,#,\$</sup>     | 0.00 (0.00)    | 0.00 (0.00)          | 0.00 (0.00)                        | 0.00 (0.00)   |
| IL-10                   | 0.00 (0.00)                  | 0.00 (0.00)                        | 0.00 (0.00)    | 0.00 (0.00)          | 0.00 (0.00)                        | 0.00 (0.00)   |
| IL-6                    | 0.00 (0.00)                  | 1179.63 (323.29) <sup>*,#,\$</sup> | 0.00 (0.00)    | 0.00 (0.00)          | 20.45 (3.83)                       | 4.29 (4.29)   |
| IL-27                   | 0.00 (0.00)                  | 137.76 (81.43) <sup>*,#,\$</sup>   | 0.00 (0.00)    | 0.00 (0.00)          | 0.00 (0.00)                        | 0.00 (0.00)   |
| IL-17A                  | 0.42 (0.42)                  | 25.31 (10.22) <sup>*,#,\$</sup>    | 0.00 (0.00)    | 0.00 (0.00)          | 0.00 (0.00)                        | 0.00 (0.00)   |
| IFN-β                   | 0.00 (0.00)                  | 0.00 (0.00)                        | 0.00 (0.00)    | 0.00 (0.00)          | 0.00 (0.00)                        | 0.00 (0.00)   |
| GM-CSF                  | 0.00 (0.00)                  | 0.00 (0.00)                        | 0.00 (0.00)    | 0.00 (0.00)          | 0.00 (0.00)                        | 0.00 (0.00)   |
| <b>7 d</b>              |                              |                                    |                |                      |                                    |               |
| IL-23                   | 41.43 (14.43)                | 30.14 (19.51)                      | 20.66 (20.66)  | 9.07 (5.32)          | 29.77 (12.87)                      | 12.69 (12.69) |
| IL-1α                   | 1.05 (0.18)                  | 41.50 (23.66)                      | 1.62 (0.92)    | 5.54 (4.27)          | 4.60 (2.50)                        | 1.79 (0.85)   |
| IFN-γ                   | 0.00 (0.00)                  | 53.36 (40.45) <sup>\$</sup>        | 0.00 (0.00)    | 0.00 (0.00)          | 0.00 (0.00)                        | 0.00 (0.00)   |
| TNF-α                   | 0.00 (0.00)                  | 93.32 (36.14) <sup>*,#,\$</sup>    | 0.00 (0.00)    | 3.17 (3.17)          | 2.41 (1.54)                        | 0.00 (0.00)   |
| MCP-1                   | 0.00 (0.00)                  | 14.83 (14.83)                      | 0.00 (0.00)    | 0.00 (0.00)          | 0.00 (0.00)                        | 0.00 (0.00)   |
| IL-12p70                | 0.00 (0.00)                  | 1.54 (1.54)                        | 0.00 (0.00)    | 0.00 (0.00)          | 0.00 (0.00)                        | 0.00 (0.00)   |
| IL-1β                   | 0.00 (0.00)                  | 1.43 (1.43)                        | 0.00 (0.00)    | 0.00 (0.00)          | 0.00 (0.00)                        | 0.00 (0.00)   |
| IL-10                   | 0.00 (0.00)                  | 6.84 (6.84)                        | 0.00 (0.00)    | 0.00 (0.00)          | 0.00 (0.00)                        | 0.00 (0.00)   |
| IL-6                    | 0.00 (0.00)                  | 232.41 (182.45)                    | 0.00 (0.00)    | 5.19 (5.19)          | 16.72 (16.72)                      | 0.00 (0.00)   |
| IL-27                   | 0.00 (0.00)                  | 26.87 (26.87)                      | 0.00 (0.00)    | 0.00 (0.00)          | 0.00 (0.00)                        | 0.00 (0.00)   |
| IL-17A                  | 0.00 (0.00)                  | 13.67 (11.48)                      | 0.00 (0.00)    | 0.00 (0.00)          | 0.00 (0.00)                        | 0.00 (0.00)   |
| IFN-β                   | 0.00 (0.00)                  | 0.00 (0.00)                        | 0.00 (0.00)    | 0.00 (0.00)          | 0.00 (0.00)                        | 0.00 (0.00)   |
| GM-CSF                  | 0.00 (0.00)                  | 0.00 (0.00)                        | 0.00 (0.00)    | 0.00 (0.00)          | 0.00 (0.00)                        | 0.00 (0.00)   |

545 <sup>a</sup>Mean pg/ml (SEM) from two independent experiments at each timepoint is displayed.

546 <sup>b</sup>\**P* < 0.05 relative to *tlr4* mutant at same inoculum; #*P* < 0.05 relative to mock in same mouse  
547 strain. \$*P* < 0.05 relative to 10<sup>5</sup> inoculum in same mouse strain. Two-way ANOVA, Tukey's test  
548 for multiple comparisons. Significant differences are also highlighted in green.

549

550 **Table S2. MICs for *A. baumannii* strains G636 and G654.**

| <b>Antibiotic</b>    | <b>G636<br/>(Resistant/Sensitive)</b> | <b>G654<br/>(Resistant/Sensitive)</b> | <b>Clinical<br/>Breakpoint<sup>a</sup></b> |
|----------------------|---------------------------------------|---------------------------------------|--------------------------------------------|
| <b>Imipenem</b>      | >256 µg/ml (Resistant)                | >256 µg/ml (Resistant)                | 2 µg/ml                                    |
| <b>Ampicillin</b>    | >256 µg/ml (N/A)                      | >256 µg/ml (N/A)                      | N/A <sup>c</sup>                           |
| <b>Ciprofloxacin</b> | >256 µg/ml (Resistant)                | >256 µg/ml (Resistant)                | 1 µg/ml                                    |
| <b>Levofloxacin</b>  | 32 µg/ml (Resistant)                  | 128 µg/ml (Resistant)                 | 2 µg/ml                                    |
| <b>Colistin</b>      | 1 µg/ml (Intermediate) <sup>b</sup>   | 8 µg/ml (Resistant)                   | 2 µg/ml <sup>b</sup>                       |
| <b>Polymyxin B</b>   | 2 µg/ml (Intermediate) <sup>b</sup>   | 4 µg/ml (Resistant)                   | 2 µg/ml <sup>b</sup>                       |
| <b>Tigecycline</b>   | 2 µg/ml (N/A) <sup>c</sup>            | 1 µg/ml (N/A) <sup>c</sup>            | N/A <sup>c</sup>                           |
| <b>Gentamicin</b>    | >256 µg/ml (Resistant)                | 2-4 µg/ml (Sensitive)                 | 4 µg/ml                                    |
| <b>Apramycin</b>     | 16 µg/ml (N/A) <sup>c</sup>           | 16 µg/ml (N/A) <sup>c</sup>           | N/A <sup>c</sup>                           |

551 <sup>a</sup>Clinical breakpoints are according to the Clinical and Laboratory Standard Institute (CLSI) M100  
552 Performance Standards for Antimicrobial Susceptibility Testing 30<sup>th</sup> Edition (122).

553 <sup>b</sup> A “sensitive” breakpoint is not available for colistin or polymyxin B from the CLSI. Strains with  
554 MICs of less than or equal to 2 µg/ml are considered to have “intermediate resistance.”

555 <sup>c</sup>The clinical breakpoint has not been defined for ampicillin, tigecycline, and apramycin by the  
556 CLSI.

557

558 **Table S3. Plasmids and strains used in this study.**

| Plasmid or Strain                            | Description <sup>a</sup>                                                                                                                                                                                                                              | Source <sup>b</sup> |
|----------------------------------------------|-------------------------------------------------------------------------------------------------------------------------------------------------------------------------------------------------------------------------------------------------------|---------------------|
| Plasmids                                     |                                                                                                                                                                                                                                                       |                     |
| pEX18Tc                                      | Precursor plasmid used for generation of pEX18Ap; Tet <sup>r</sup>                                                                                                                                                                                    | (114)               |
| pKD4-Apr                                     | Source for apramycin cassette for mutant generation; Apr <sup>r</sup>                                                                                                                                                                                 | (115)               |
| pEX18Ap                                      | Plasmid background used for generation of <i>A. baumannii</i> mutants; Apr <sup>r</sup>                                                                                                                                                               | This study          |
| pEX18Ap::G636 <i>invLKO</i>                  | Plasmid used for mutation of <i>invL</i> in G636; Apr <sup>r</sup>                                                                                                                                                                                    | This study          |
| pUC18T-miniTn7T-Apr                          | Vector used for genetic complementation at the mTn7 site; Apr <sup>r</sup>                                                                                                                                                                            | (116)               |
| pUC18T-miniTn7T-Apr::G636 <i>invLKO</i> comp | Plasmid used for complementation of the $\Delta$ <i>invL</i> mutant; Apr <sup>r</sup>                                                                                                                                                                 | This study          |
| PB-FLuc+GFPd2                                | Plasmid source for <i>gfp</i> cassette; Amp <sup>r</sup>                                                                                                                                                                                              | <sup>b</sup>        |
| pUC18T-miniTn7T-Apr::gfpd2                   | Expression vector; Apr <sup>r</sup>                                                                                                                                                                                                                   | This study          |
| pRK2013                                      | Helper plasmid for mobilization of non-self-transmissible plasmids; Kan <sup>r</sup>                                                                                                                                                                  | (123)               |
| pTNS2                                        | T7 transposase expression vector; Amp <sup>r</sup>                                                                                                                                                                                                    | (124)               |
| Strains                                      |                                                                                                                                                                                                                                                       |                     |
| <i>E. coli</i>                               |                                                                                                                                                                                                                                                       |                     |
| Stellar                                      | <i>mrr-hsdRMS-mcrBC</i> and <i>mcrA</i> ; Host strain for cloning                                                                                                                                                                                     | TaKaRa              |
| HB101                                        | F- <i>mcrB mrr hsdS20</i> (rB- mB-) <i>recA13 leuB6 ara-14 proA2 lacY1 galK2 xyl-5 mtl-1 rpsL20 glnV44</i> $\lambda$ -; Host strain for pRK2013                                                                                                       | Promega             |
| EC100D                                       | F - <i>mcrA</i> $\Delta$ ( <i>mrr-hsdRMS-mcrBC</i> ) $\phi$ 80 <i>dlacZ</i> $\Delta$ M15 $\Delta$ <i>lacX74 recA1 endA1 araD139</i> $\Delta$ ( <i>ara, leu</i> )7697 <i>galU galK</i> $\lambda$ - <i>rpsL nupG pir</i> +(DHFR); Host strain for pTNS2 | Fisher              |
| <i>A. baumannii</i>                          |                                                                                                                                                                                                                                                       |                     |
| G636                                         | 2018 <i>A. baumannii</i> respiratory isolate (Strain 3689)                                                                                                                                                                                            | <sup>c</sup>        |
| G636 $\Delta$ <i>invL</i>                    | G636 <i>invL</i> mutant                                                                                                                                                                                                                               | This study          |
| G636 <i>invL</i> <sup>+</sup>                | G636 <i>invL</i> mutant complemented                                                                                                                                                                                                                  | This study          |
| G636 $\Delta$ <i>bap</i>                     | G636 <i>bap</i> mutant                                                                                                                                                                                                                                | This study          |
| G636 $\Delta$ <i>ata</i>                     | G636 <i>ata</i> mutant                                                                                                                                                                                                                                | This study          |
| G636 $\Delta$ <i>fhaBC</i>                   | G636 <i>fhaBC</i> mutant                                                                                                                                                                                                                              | This study          |
| G636- <i>gfp</i>                             | G636 expressing <i>gfpd2</i>                                                                                                                                                                                                                          | This study          |
| G654                                         | 2020 <i>A. baumannii</i> respiratory isolate (Strain 6919)                                                                                                                                                                                            | <sup>c</sup>        |
| Ab19606                                      | 1948 <i>A. baumannii</i> urinary isolate                                                                                                                                                                                                              | (125)               |
| <i>S. aureus</i>                             |                                                                                                                                                                                                                                                       |                     |
| Newman                                       | 1952 osteomyelitis isolate                                                                                                                                                                                                                            | (126)               |
| <i>K. pneumoniae</i>                         |                                                                                                                                                                                                                                                       |                     |
| TOP52                                        | 2006 cystitis isolate                                                                                                                                                                                                                                 | (127)               |

559 <sup>a</sup>Tet, tetracycline; Apr, apramycin; Amp, ampicillin; Kan, kanamycin.

560 <sup>b</sup>PB-FLuc+GFPd2 was a gift from Jordan Green (Addgene plasmid # 127190;  
561 <http://n2t.net/addgene:127190>; RRID: Addgene\_127190).

562 <sup>c</sup>Strains G636 and G654 were collected by the CDC-funded Georgia Emerging Infections  
563 Program's (EIP) Multi-site Gram-Negative Surveillance Initiative (MuGSI) and kindly provided by  
564 Sarah Satola.

565

566

567 **Table S4. Primers used in this study.**

| Primer                             | Sequence                                                |
|------------------------------------|---------------------------------------------------------|
| 5' pEX18 marker swap               | ACACGGTGCCTGACTGCGTTAGC                                 |
| 3' pEX18 marker swap               | ATGGAAGCCGGCGGCACC                                      |
| 5' Apr for pEX18Ap                 | GAGGTGCCGCCGGCTTCCATGATCCTCAGCCAATCGACTGGC              |
| 3' Apr for pEX18Ap                 | AACGCAGTCAGGCACCGTGTGATTCCCTTTGTCAACAGCAATGG            |
| 5' pEX18Tc                         | ATGCCTGCAGGTGCGACTCTAGAGG                               |
| 3' pEX18Tc                         | GCAAGCTTGGCACTGGCCGT                                    |
| 5' F1 G636 <i>invLKO</i>           | ACGGCCAGTGCCAAGCTTGCGGCAATGTCTCAAATAAAAAATTTAACTC       |
| 3' F1 G636 <i>invLKO</i>           | TGAGATCCGCTATTACTTCCAG                                  |
| 5' F2 G636 <i>invLKO</i>           | AGTAATAATAGCGGATCTCATGCTTCTTTTTTTAGAGTTGTGTTCC          |
| 3' F2 G636 <i>invLKO</i>           | TAGAGTCGACCTGCAGGCATAAAATAACCGCATAGCCAGCTTGAGC          |
| 5' G636 <i>fdeCKO</i> Comp         | GCATGAGCTCACTAGTGGATCCGAGATTAAGACTTTACTTGGCATAACACC     |
| 5' F1 G636 <i>bapKO</i>            | ACGGCCAGTGCCAAGCTTGCAGAAGCGGCTGGCAATGTCACG              |
| 3' F1 G636 <i>bapKO</i>            | TCAAGCACCGGTGCATACTGACC                                 |
| 5' F2 G636 <i>bapKO</i>            | CAGTATGCACCGGTGCTTGAGGTGGTAACACTACAATTCAGATTGACC        |
| 3' F2 G636 <i>bapKO</i>            | TAGAGTCGACCTGCAGGCATTCCATAAATGAATTTGCCATTTTCTTGAACTCTG  |
| 5' F1 G636 <i>ataKO</i>            | ACGGCCAGTGCCAAGCTTGTCTAAGTCGGTCTGGCTATTTCGCC            |
| 3' F1 G636 <i>ataKO</i>            | TGATGACGTTGAGAAAAAAGCTAATGCAGG                          |
| 5' F2 G636 <i>ataKO</i>            | CTTTTTTCTCAACGTCATCAAAAACCTTCTCAGACAAATACCGAACTCAACG    |
| 3' F2 G636 <i>ataKO</i>            | TAGAGTCGACCTGCAGGCATCGTGATCAATTTCTTCTGTAAGCGAATCTTTTTGC |
| 5' F1 G636 <i>fhaBCKO</i>          | ACGGCCAGTGCCAAGCTTGTCTAAAATTTTAAAGCAGTTTGATGAGCC        |
| 3' F1 G636 <i>fhaBCKO</i>          | CAGAATTGTACGTATAAGAACTTTATTTTACAC                       |
| 5' F2 G636 <i>fhaBCKO</i>          | TTCTTATACGTACAATTCTGTAACAATGAAAAATGCACATGCGG            |
| 3' F2 G636 <i>fhaBCKO</i>          | TAGAGTCGACCTGCAGGCATCTTTATTGGTACCCTGATTGCG              |
| 3' G636 <i>fdeCKO</i> Comp-His6 v2 | TCAGTGGTGATGGTGATGATGATTACCATTTGAACAGTTTGGATCTATTCC     |
| Tn7 linear Fwd-His6                | CATCATCACCATCACCCTGAAAGCTTGGGCCCGGTACCTC                |
| Tn7 linear Rev                     | GGATCCACTAGTGAGCTCATGC                                  |

|                           |                                              |
|---------------------------|----------------------------------------------|
| 5' d2EGFP for pUC18T-mTn7 | AGAAAGAGGAGAAATACTAGATGGTGAGCAAGGGCGAGG      |
| 3' d2EGFP for pUC18T-mTn7 | GAGGTACCGGGCCCAAGCTTCTACACATTGATCCTAGCAGAAGC |
| 5' pUC18T-mTn7 for d2EGFP | AAGCTTGGGCCCCGGTACCTCG                       |
| 3' pUC18T-mTn7 for d2EGFP | CTAGTATTTCTCCTCTTTCTCTAGTAATTGTTATCC         |

568

569

622 **Figure S1.** Intracellular *A. baumannii* are detectable in BALF at early timepoints in the chronic  
623 respiratory infection model. Groups of C3H/HeJ (*tlr4* mutant) mice were intranasally inoculated  
624 with  $10^5$  G636, and BALF was collected at 4 hpi (A), 2 dpi (B), and 7 dpi (C) and either treated  
625 with 50  $\mu$ g/ml colistin or mock-treated. Following, bacterial CFU in the treated (intracellular; IC)  
626 and mock treated (total) BALF, as well as in the remaining lungs following BALF collection, were  
627 enumerated by serial dilution plating. The horizontal line represents the mean, and the SEM is  
628 indicated by error bars. Shown are the results from at least two independent experiments.  
629 C3H/HeJ (*tlr4* mutant) mice were infected with G636 expressing *gfp*, and, at these same  
630 timepoints, BALF was collected, and host cells were isolated and stained with DAPI (blue) and  
631 phalloidin (red). Intracellular bacteria were identified by microscopy at 4 hpi (D) and 2 dpi (E).  
632 Shown are representative images from independent samples from at least two biological  
633 replicates. Scale bar = 5  $\mu$ m.

634 **Figure S2.** The chronic respiratory infection model results in lung pathology during infection.  
635 Groups of C3H/HeJ (*tlr4* mutant) mice were inoculated with  $10^5$  G636 or mock-inoculated with  
636 PBS, and at 4 hpi (A), 2 dpi (B), 7 dpi (C), 14 dpi (D), and 21 dpi (E), lungs slices were prepared  
637 and H&E stained. Shown are representative images from each timepoint. Lung slice scale bar:  
638 1000  $\mu$ m; Inset scale bar: 100  $\mu$ m.

639 **Figure S3.** The chronic respiratory infection model does not cause goblet cell hyperplasia or  
640 fibrosis. Groups of C3H/HeJ (*tlr4* mutant) mice were inoculated with  $10^5$  G636 or mock-inoculated  
641 with PBS, and at 4 hpi, 2 dpi, 7 dpi, 14 dpi, and 21 dpi, lungs slices were prepared, H&E stained,  
642 and scored for goblet cell hyperplasia (A) and fibrosis (B). The mean is shown on the graph, and  
643 the SEM is indicated by error bars. Unpaired Student's *t*-test.

644 **Figure S4.** Testing of G636 adhesin mutants in the chronic respiratory infection model reveals a  
645 potential role for InvL in bacterial persistence. Groups of C3H/HeJ (*tlr4* mutant) mice were  
646 intranasally inoculated with  $10^5$  G636, G636  $\Delta$ *bap*, G636  $\Delta$ *ata*, G636  $\Delta$ *fhaBC*, and G636  $\Delta$ *invL*.  
647 1 (A) and 14 (B) dpi, mice were sacrificed, and CFU in the lungs were quantified. Each data point  
648 represents an individual mouse, the horizontal line represents the mean, and the SEM is indicated  
649 by error bars. Shown are results from single experiments for each strain.

650 **Figure S5.** The chronic respiratory infection model can be used to study outcomes of antibiotic  
651 treatment. Groups of C3H/HeJ (*tlr4* mutant) mice were infected with  $10^5$  G636 (A, C) or  $10^5$  G654  
652 (B, D) and sacrificed at 1, 3, and 5 dpi (long-term). Additionally, groups of C57Bl/6 mice were  
653 infected with  $10^9$  G636 (A, C) or  $10^9$  G654 (B, D) and sacrificed at 24 hpi (acute). Mice in both  
654 infection models were treated intraperitoneally treated with PBS or 5 mg/kg *colistin* (col) every 8  
655 h (A, B) or PBS or 100 mg/kg *imipenem* (im) every 12 h (C, D) with all treatments beginning 4 hpi.  
656 At each timepoint, CFU were quantified in the lungs. Shown are the results from at least two

657 independent experiments, each data point represents an individual mouse, the horizontal line  
658 represents the mean, and the SEM is represented by error bars. \* $P < 0.05$ ; Mann-Whitney  $U$  test.

659 **Figure S6.** *S. aureus* secondary infection sometimes causes *A. baumannii* dissemination to the  
660 spleen and kidneys in the chronic respiratory infection model. C3H/HeJ (*tlr4* mutant) mice were  
661 intranasally inoculated with  $10^5$  G636. At 14 days post-*A. baumannii* infection, groups of mice  
662 were either not inoculated (untreated), inoculated with PBS (mock-infected), infected with *S.*  
663 *aureus*, or infected with *K. pneumoniae*. Subsequently, on days 15 (A and B) and 16 (C and D)  
664 post-*A. baumannii* infection (1 and 2 days post-secondary infection), groups of mice were  
665 sacrificed, and *A. baumannii* CFU were quantified in the spleen (A and C), and kidneys (C and  
666 D). Each data point represents an individual mouse, the horizontal line represents the mean, and  
667 the SEM is indicated by error bars. Shown are results from at least 2 independent experiments.  
668 Significant differences were not detected; Kruskal-Wallis  $H$  test with Dunn's test for multiple  
669 comparisons.

670 **Figure S7.** Ongoing *A. baumannii* pneumonia alters bacterial numbers following secondary  
671 infection with *S. aureus* and *K. pneumoniae*. C3H/HeJ (*tlr4* mutant) mice were either intranasally  
672 inoculated with  $10^5$  G636 14 days prior to infection with *S. aureus* or *K. pneumoniae* (+Ab) or not  
673 infected prior to *S. aureus* or *K. pneumoniae* infection (-Ab). At 14 days post-*A. baumannii*  
674 infection, groups of mice were infected with *S. aureus* or *K. pneumoniae*. 1 and 2 dpi with *S.*  
675 *aureus* (A, B, and C) or *K. pneumoniae* (D, E, and F), mice were sacrificed, and these bacteria  
676 were quantified in the lung (A and D), spleen (B and E), and kidneys (C and F). Each data point  
677 represents an individual mouse, the horizontal line represents the mean, and the SEM is indicated  
678 by error bars. Shown are results from at least 2 independent experiments. \* $P < 0.05$ ; Mann-  
679 Whitney  $U$  test.

680



699 Figure S1:

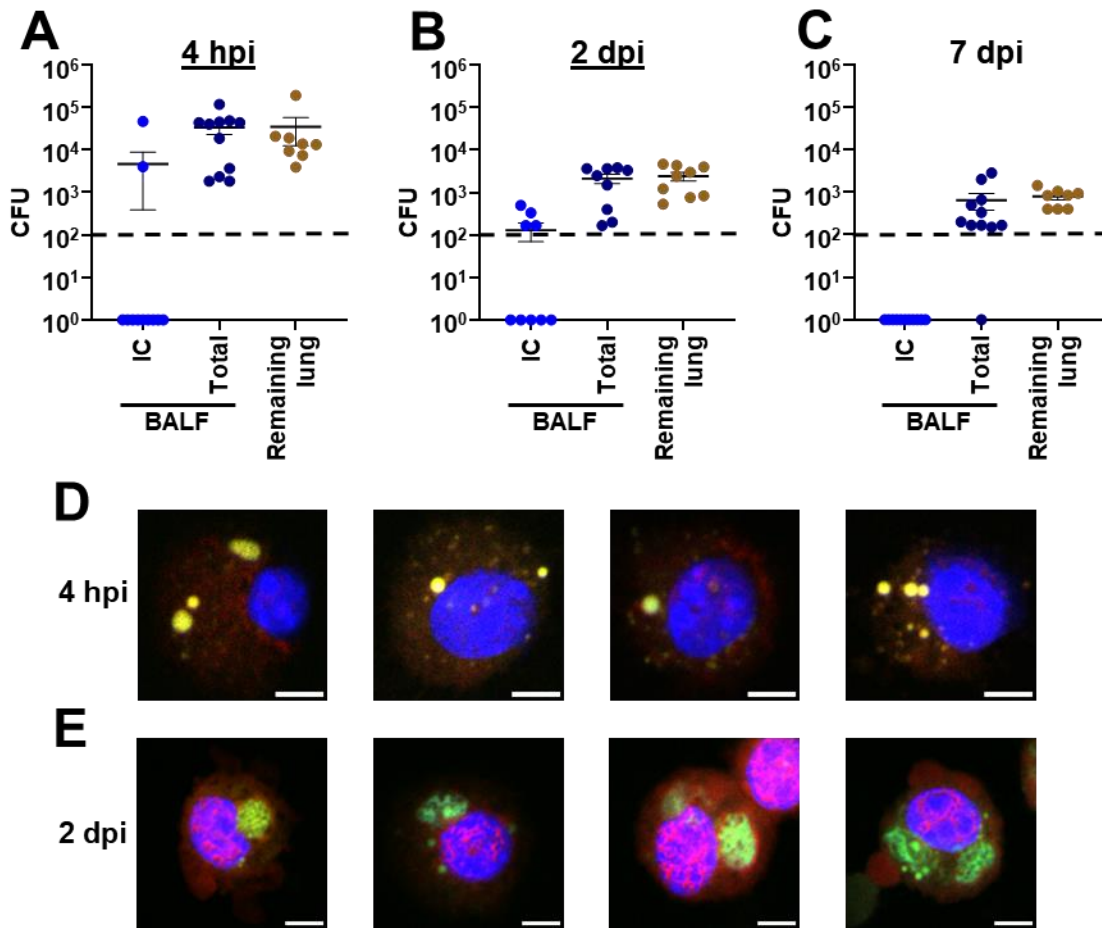

700

701

702 Figure S2:

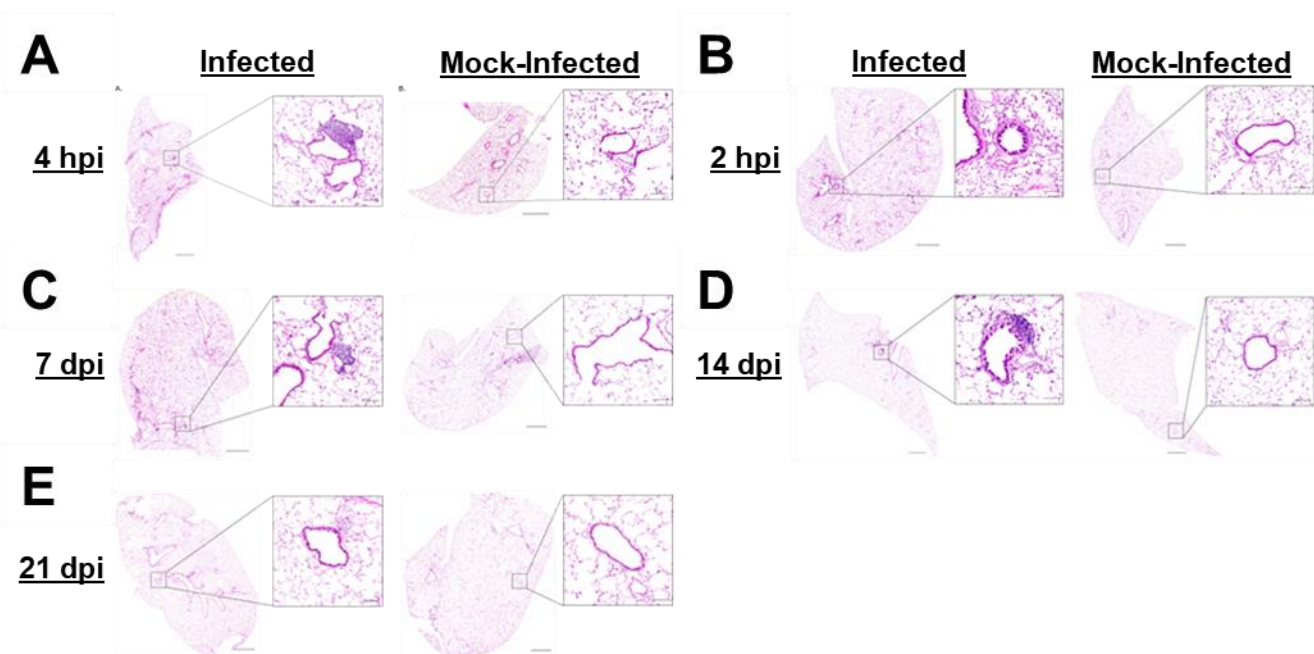

703

704

705 Figure S3

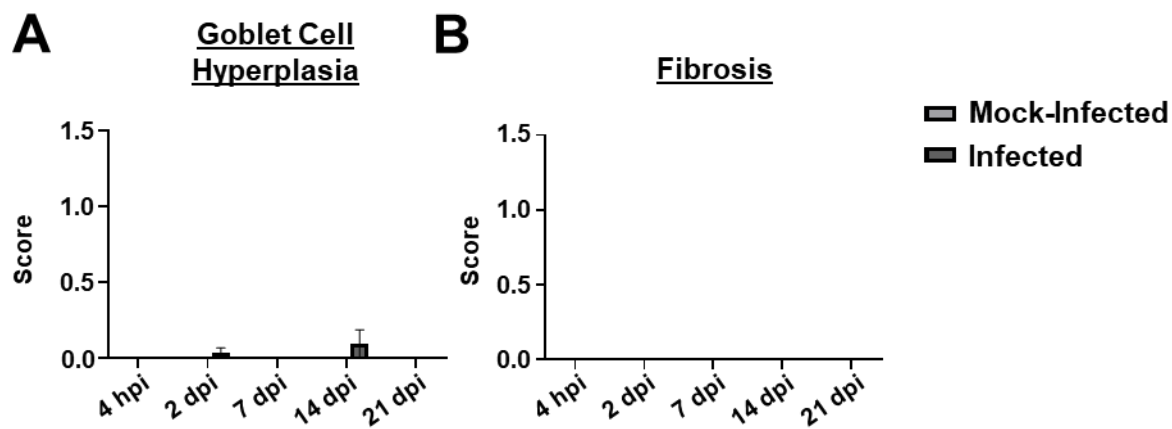

706

707

708 Figure S4:

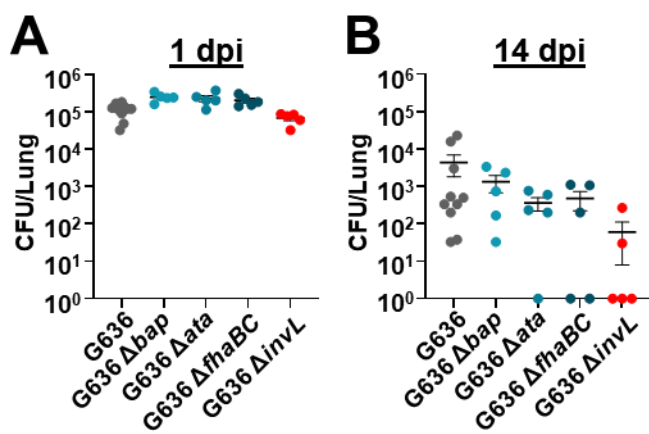

709

710

711 Figure S5

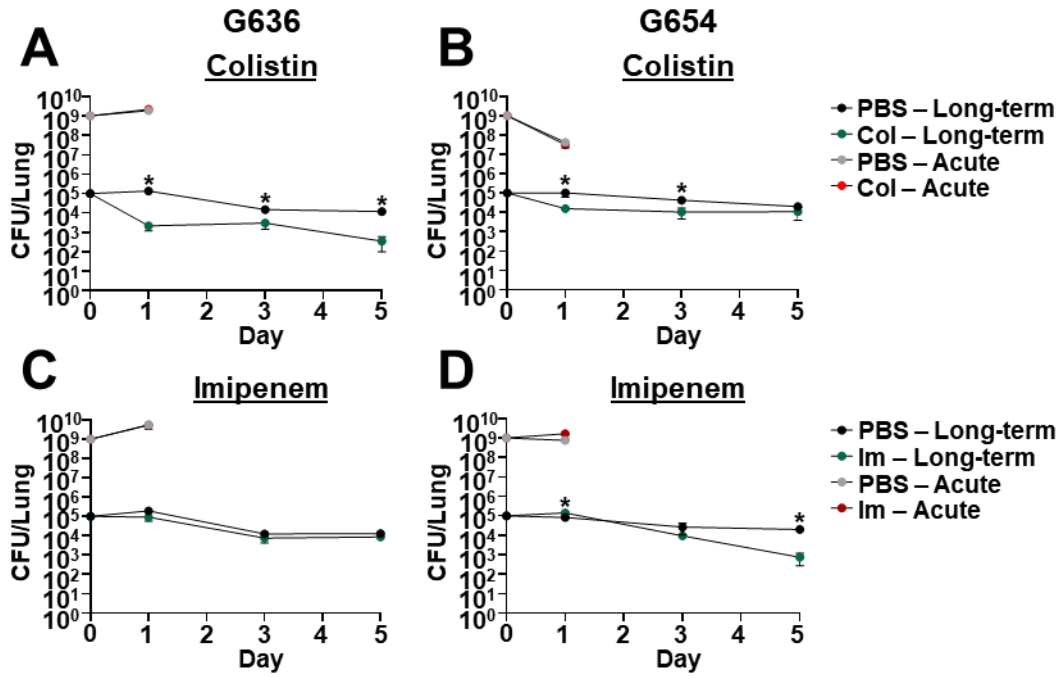

712

713

714 Figure S6

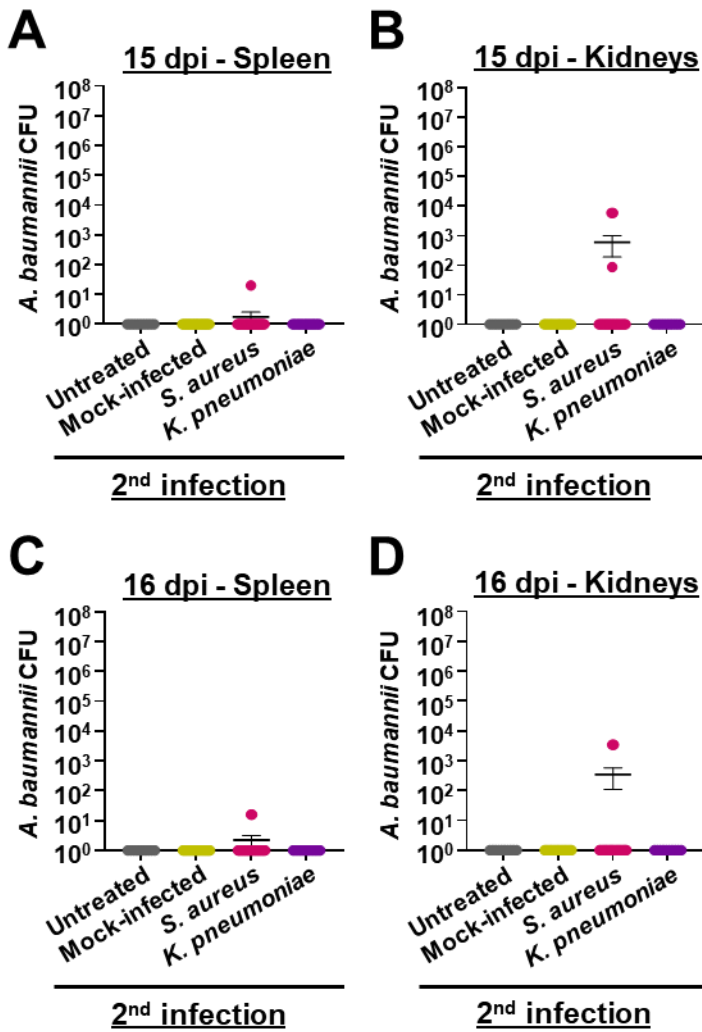

715

716

717 Figure S7

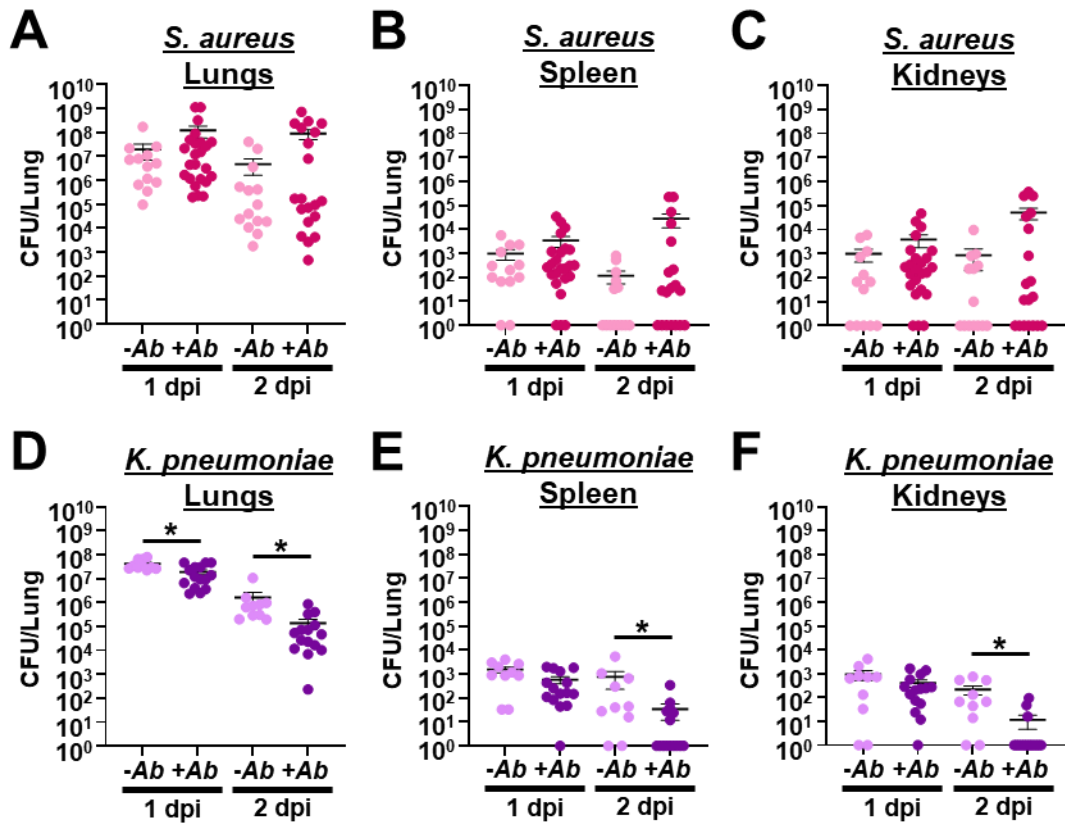

718

719
